# Supplementary material for: Maternal and Fetal Risk Factors for Hypospadias: A Nested Case-Control Study in Southern China
Source: Research Square preprint supplement (doi:10.21203/rs.3.rs-8623489/v1), 2026-02-16
Supplement: Supplementary file 1 [file 6c83ceac558789e3e4b12bb3.docx]

Table 1 Comparison of characteristics among offsprings with hypospadias and without hypospadias

| Variables | Total  ( n = 576 )  No. (%) | Offsprings without hypospadias  ( n = 480 )  No. (%) | Offsprings with hypospadias  ( n = 96 )  No. (%) | *p* |
| --- | --- | --- | --- | --- |
| Age, years | 29.55 (27.00, 32.00) | 29.00 (26.00 , 33.00 ) | 30.00 (27.00 , 32.00 ) | 0.715 |
| Maririage |  |  |  | 0.493 |
| Married | 546 ( 94.79 ) | 456 ( 95.0) | 90（ 93.75 ） |  |
| Single | 26 ( 4.51 ) | 20 ( 4.17 ) | 6 ( 6.25 ) |  |
| Divorced | 4 ( 0.69 ) | 4 ( 0.83 ) | 0 ( 0.00 ) |  |
| Parity |  |  |  | 0.262 |
| Nulliparous | 312 ( 54.17 ) | 255 ( 53.13 ) | 57 ( 59.38 ) |  |
| Parous | 264 ( 45.83 ) | 225 ( 46.88 ) | 39 ( 40.63 ) |  |
| Race/ethnicity |  |  |  | 0.011 |
| Han | 544 ( 94.44 ) | 457 ( 95.21 ) | 87 ( 90.63 ) |  |
| Li | 24 ( 4.17 ) | 15 ( 3.13 ) | 9 ( 9.38 ) |  |
| others | 8 ( 1.39 ) | 8 (1.67 ) | 0 (0.00 ) |  |
| Maternal education |  |  |  | < 0.001 |
| Junior high school and blow | 149 ( 25.87 ) | 107 ( 22.29 ) | 42 ( 43.75 ) |  |
| Senior high school | 99 ( 17.19 ) | 87 ( 18.13 ) | 12 ( 12.50 ) |  |
| Bachelor and above | 328 ( 56.94 ) | 286 ( 59.58 ) | 42 ( 43.75 ) |  |
| Pre-pregnancy BMI | 21.18 (19.36 , 22.89 ) | 20.71 (18.74 , 22.89 ) | 20.89 (19.44 , 22.94 ) | 0.642 |
| BW gain during pregnancy | 13.66 (10.10 , 17.00 ) | 13.00 (10.00 , 17.00 ) | 13.95 (10.50 , 17.00 ) | 0.79 |
| BMI at delivery | 26.65 (24.40 , 28.72 ) | 26.06 (24.16 , 29.24 ) | 26.84 (24.43 , 28.67 ) | 0.71 |
| Gestational hypertension |  |  |  | < 0.001 |
| No | 544 ( 94.44 ) | 467 ( 97.29 ) | 77 ( 80.21 ) |  |
| Yes | 32 ( 5.56 ) | 13 ( 2.71 ) | 19 ( 19.79 ) |  |
| Gestational diabetes |  |  |  | < 0.001 |
| No | 477 ( 82.81 ) | 410 ( 85.42 ) | 67 ( 69.79 ) |  |
| Yes | 99 ( 17.19 ) | 70 ( 14.58 ) | 29 ( 30.21 ) |  |
| Hypothyroidism |  |  |  | < 0.001 |
| No | 556 ( 96.53 ) | 474 ( 98.75 ) | 82 ( 85.42 ) |  |
| Yes | 20 ( 3.47 ) | 6 ( 1.25 ) | 14 ( 14.58 ) |  |
| Intrahepatic cholestasis of pregnancy |  |  |  | < 0.001 |
| No | 566 ( 98.26 ) | 476 ( 99.17 ) | 90 ( 93.75 ) |  |
| Yes | 10 ( 1.74 ) | 4 ( 0.83 ) | 6 ( 6.25 ) |  |
| Hyperthyroidism |  |  |  | 0.306 |
| No | 574 ( 99.65 ) | 479 ( 99.79 ) | 95 ( 98.96 ) |  |
| Yes | 2 ( 0.35 ) | 1 ( 0.21 ) | 1 ( 1.04 ) |  |
| HBV infection |  |  |  | 0.530 |
| No | 550 ( 95.49 ) | 460 ( 95.83 ) | 90 ( 93.75 ) |  |
| Yes | 26 ( 4.51 ) | 20 ( 4.17 ) | 6 ( 6.25 ) |  |
| Syphilis |  |  |  | 1.000 |
| No | 575 ( 99.83 ) | 479 ( 99.79 ) | 96 ( 100.00 ) |  |
| Yes | 1 ( 0.17 ) | 1 ( 0.21 ) | 0 ( 0.00 ) |  |
| Multiple pregnancies |  |  |  |  |
| No | 560 ( 97.22 ) | 477 ( 99.38 ) | 83 ( 86.46 ) | < 0.001 |
| Yes | 16 ( 2.78 ) | 3 ( 0.63 ) | 13 ( 13.54 ) |  |
| Cesarean section |  |  |  | 0.061 |
| No | 314 ( 54.51 ) | 270 ( 56.25 ) | 44 ( 45.83 ) |  |
| Yes | 262 ( 45.49 ) | 210 ( 43.75 ) | 52 ( 54.17 ) |  |
| Fertility treatment |  |  |  | 0.017 |
| No | 547 ( 94.97 ) | 461 ( 96.04 ) | 86 ( 89.58 ) |  |
| Yes | 29 ( 5.03 ) | 19 ( 3.96 ) | 10 ( 10.42 ) |  |
| Gestational age, weeks |  |  |  | < 0.001 |
| Preterm ( < 37 ) | 59 (10.24) | 21 ( 4.38 ) | 38 ( 39.58 ) |  |
| Full term（ ≥ 37） | 517 ( 89.76 ) | 459 ( 95.63 ) | 58 ( 60.42 ) |  |
| Birth weight, g |  |  |  | < 0.001 |
| < 2500 | 58 ( 10.07 ) | 15 ( 3.13 ) | 43 ( 44.79 ) |  |
| ≥ 2500 | 518 ( 89.93 ) | 465 ( 96.88 ) | 53 (55.21 ) |  |

Table 2 Association between the identified risk factors and hypospadias (multivariable logistic regression, odds ratio, and 95% confidence intervals)

| Variables | OR | 95%CI | *P* |
| --- | --- | --- | --- |
| Race/ethnicity | 1.550 | 0.460 - 5.222 | 0.779 |
| Maternal education |  |  |  |
| Junior high school and blow | 2.796 | 1.503 - 5.203 | 0.001 |
| Senior high school | 0.734 | 0.300 - 1.800 | 0.500 |
| Bachelor and above |  | 1.000 |  |
| Gestational hypertension | 6.269 | 2.437 - 16.126 | <0.001 |
| Gestational diabetes | 1.648 | 0.825 - 3.292 | 0.367 |
| Intrahepatic cholestasis of pregnancy | 13.860 | 3.000 - 64.025 | <0.001 |
| Hypothyroidism | 16.627 | 5.008 - 55.202 | <0.001 |
| Multiple pregnancies | 7.892 | 1.047 - 59.482 | 0.045 |
| Gestational age | 0.972 | 0.307 - 3.079 | 0.962 |
| Birth weight | 19.065 | 6.579 - 55.250 | < 0.001 |
